# Supplementary material
Source: PubMed Central journal article supplement (PMC7306160)
Supplement: mmc1.pdf [file mmc1.pdf]

# THE LANCET

## Supplementary appendix

This appendix formed part of the original submission and has been peer reviewed. We post it as supplied by the authors.

Supplement to: Banerjee A, Pasea L, Harris S, et al. Estimating excess 1-year mortality associated with the COVID-19 pandemic according to underlying conditions and age: a population-based cohort study. *Lancet* 2020; published online May 12. [http://dx.doi.org/10.1016/S0140-6736\(20\)30854-0](http://dx.doi.org/10.1016/S0140-6736(20)30854-0).

**Suppl Table 1. High-risk mortality groups for COVID-19 infection in 3,862,012 individuals by age and gender.**

|                                                      | <b>Men<br/>Age ≤70 years<br/>N=1696728</b> | <b>Men<br/>Age&gt;70 years<br/>N=207349</b> | <b>Women<br/>Age≤70 years<br/>N=1634552</b> | <b>Women<br/>Age&gt;70 years<br/>N=323383</b> |
|------------------------------------------------------|--------------------------------------------|---------------------------------------------|---------------------------------------------|-----------------------------------------------|
| <b>Demographics</b>                                  |                                            |                                             |                                             |                                               |
| Age (years), mean (SD)                               | 43.5 (11.66)                               | 78.1 (6.11)                                 | 43.5 (11.91)                                | 80.2 (7.03)                                   |
| IMD quintile                                         |                                            |                                             |                                             |                                               |
| 1 (Least deprived)                                   | 384993 (22.7)                              | 45735 (22.1)                                | 382183 (23.4)                               | 69913 (21.6)                                  |
| 2                                                    | 368204 (21.7)                              | 47890 (23.1)                                | 362914 (22.2)                               | 74205 (22.9)                                  |
| 3                                                    | 353908 (20.9)                              | 45247 (21.8)                                | 344154 (21.1)                               | 71130 (22)                                    |
| 4                                                    | 317818 (18.7)                              | 37921 (18.3)                                | 298922 (18.3)                               | 59482 (18.4)                                  |
| 5 (Most deprived)                                    | 270037 (15.9)                              | 30326 (14.6)                                | 244771 (15)                                 | 48276 (14.9)                                  |
| Practice region                                      |                                            |                                             |                                             |                                               |
| East Midlands                                        | 54965 (3.2)                                | 6669 (3.2)                                  | 51993 (3.2)                                 | 9924 (3.1)                                    |
| East Of England                                      | 196981 (11.6)                              | 23810 (11.5)                                | 188834 (11.6)                               | 36366 (11.2)                                  |
| London                                               | 297576 (17.5)                              | 27188 (13.1)                                | 289471 (17.7)                               | 43033 (13.3)                                  |
| North East                                           | 33062 (1.9)                                | 4134 (2)                                    | 31491 (1.9)                                 | 6241 (1.9)                                    |
| North West                                           | 230831 (13.6)                              | 26459 (12.8)                                | 217496 (13.3)                               | 42577 (13.2)                                  |
| South Central                                        | 218027 (12.8)                              | 26705 (12.9)                                | 210615 (12.9)                               | 42158 (13)                                    |
| South East Coast                                     | 213015 (12.6)                              | 28402 (13.7)                                | 208722 (12.8)                               | 43896 (13.6)                                  |
| South West                                           | 203035 (12)                                | 31265 (15.1)                                | 197035 (12.1)                               | 47706 (14.8)                                  |
| West Midlands                                        | 183652 (10.8)                              | 23857 (11.5)                                | 173924 (10.6)                               | 37433 (11.6)                                  |
| Yorkshire & The Humber                               | 65584 (3.9)                                | 8860 (4.3)                                  | 64971 (4)                                   | 14049 (4.3)                                   |
| <b>Risk factors recommended for social isolation</b> |                                            |                                             |                                             |                                               |
| CVD                                                  | 45650 (2.7)                                | 38158 (18.4)                                | 29668 (1.8)                                 | 45593 (14.1)                                  |
| Diabetes (any type)                                  | 42901 (2.5)                                | 17928 (8.6)                                 | 29791 (1.8)                                 | 21048 (6.5)                                   |
| Chronic kidney disease                               | 8202 (0.5)                                 | 15036 (7.3)                                 | 10136 (0.6)                                 | 26023 (8)                                     |
| COPD                                                 | 8990 (0.5)                                 | 9763 (4.7)                                  | 7475 (0.5)                                  | 8778 (2.7)                                    |
| BMI>40*                                              | 8241 (1.9)                                 | 443 (0.7)                                   | 21042 (3.7)                                 | 1447 (1.6)                                    |
| Corticosteroid rx                                    | 28935 (1.7)                                | 12215 (5.9)                                 | 43894 (2.7)                                 | 20934 (6.5)                                   |
| N risk factors                                       |                                            |                                             |                                             |                                               |
| 0                                                    | 1574734 (92.8)                             | 138916 (67)                                 | 1512639 (92.5)                              | 229571 (71)                                   |
| 1                                                    | 104205 (6.1)                               | 48663 (23.5)                                | 104972 (6.4)                                | 69704 (21.6)                                  |
| 2                                                    | 15049 (0.9)                                | 15217 (7.3)                                 | 14230 (0.9)                                 | 19082 (5.9)                                   |
| ≥3                                                   | 2740 (0.2)                                 | 4553 (2.2)                                  | 2711 (0.2)                                  | 5026 (1.6)                                    |
| <b>Other risk factors</b>                            |                                            |                                             |                                             |                                               |
| Hypertension                                         | 134650 (7.9)                               | 66955 (32.3)                                | 113473 (6.9)                                | 101135 (31.3)                                 |
| ACE inhibitor rx                                     | 73513 (4.3)                                | 38847 (18.7)                                | 50299 (3.1)                                 | 52263 (16.2)                                  |
| NSAID rx                                             | 204502 (12.1)                              | 40412 (19.5)                                | 262563 (16.1)                               | 71611 (22.1)                                  |

\*BMI data available for 425782, 65549, 567034 and 89631 patients in the respective categories

**Suppl Table 2: High-risk mortality groups for COVID-19 infection in 3,862,012 individuals by underlying cardiovascular disease, diabetes, chronic kidney disease and chronic obstructive pulmonary disease.**

|                                                      | No CVD<br>N=3702943 | CVD<br>N=159069 | No DM<br>N=3750344 | DM<br>N=111668 | No CKD<br>N=3802615 | CKD<br>N=59397 | No COPD<br>N=3827006 | COPD<br>N=35006 |
|------------------------------------------------------|---------------------|-----------------|--------------------|----------------|---------------------|----------------|----------------------|-----------------|
| <b>Demographics</b>                                  |                     |                 |                    |                |                     |                |                      |                 |
| Age (years), mean (SD)                               | 47.5 (16.2)         | 68.9 (15.1)     | 48.0 (16.5)        | 62.5 (15.8)    | 48.0 (16.4)         | 74.5 (13.9)    | 48.2 (16.6)          | 70.0 (12.0)     |
| Women                                                | 1882674 (50.8)      | 75261 (47.3)    | 1907096 (50.9)     | 50839 (45.5)   | 1921776 (50.5)      | 36159 (60.9)   | 1941682 (50.7)       | 16253 (46.4)    |
| IMD quintile                                         |                     |                 |                    |                |                     |                |                      |                 |
| 1 (Least deprived)                                   | 852344 (23)         | 30480 (19.2)    | 863864 (23)        | 18960 (17)     | 870934 (22.9)       | 11890 (20)     | 878254 (22.9)        | 4570 (13.1)     |
| 2                                                    | 818130 (22.1)       | 35083 (22.1)    | 830392 (22.1)      | 22821 (20.4)   | 839787 (22.1)       | 13426 (22.6)   | 847030 (22.1)        | 6183 (17.7)     |
| 3                                                    | 780150 (21.1)       | 34289 (21.6)    | 790522 (21.1)      | 23917 (21.4)   | 801513 (21.1)       | 12926 (21.8)   | 807186 (21.1)        | 7253 (20.7)     |
| 4                                                    | 683280 (18.5)       | 30863 (19.4)    | 690516 (18.4)      | 23627 (21.2)   | 702791 (18.5)       | 11352 (19.1)   | 706051 (18.4)        | 8092 (23.1)     |
| 5 (Most deprived)                                    | 565213 (15.3)       | 28197 (17.7)    | 571159 (15.2)      | 22251 (19.9)   | 583638 (15.3)       | 9772 (16.5)    | 584546 (15.3)        | 8864 (25.3)     |
| Practice region                                      |                     |                 |                    |                |                     |                |                      |                 |
| East Midlands                                        | 117034 (3.2)        | 6517 (4.1)      | 120284 (3.2)       | 3267 (2.9)     | 122424 (3.2)        | 1127 (1.9)     | 122539 (3.2)         | 1012 (2.9)      |
| East Of England                                      | 428720 (11.6)       | 17271 (10.9)    | 434154 (11.6)      | 11837 (10.6)   | 440118 (11.6)       | 5873 (9.9)     | 442772 (11.6)        | 3219 (9.2)      |
| London                                               | 638219 (17.2)       | 19049 (12)      | 635511 (16.9)      | 21757 (19.5)   | 645274 (17)         | 11994 (20.2)   | 652256 (17)          | 5012 (14.3)     |
| North East                                           | 70863 (1.9)         | 4065 (2.6)      | 73103 (1.9)        | 1825 (1.6)     | 74157 (2)           | 771 (1.3)      | 73814 (1.9)          | 1114 (3.2)      |
| North West                                           | 491655 (13.3)       | 25708 (16.2)    | 502994 (13.4)      | 14369 (12.9)   | 509907 (13.4)       | 7456 (12.6)    | 510965 (13.4)        | 6398 (18.3)     |
| South Central                                        | 478376 (12.9)       | 19129 (12)      | 483848 (12.9)      | 13657 (12.2)   | 490230 (12.9)       | 7275 (12.2)    | 493624 (12.9)        | 3881 (11.1)     |
| South East Coast                                     | 475437 (12.8)       | 18598 (11.7)    | 478353 (12.8)      | 15682 (14)     | 486524 (12.8)       | 7511 (12.6)    | 489787 (12.8)        | 4248 (12.1)     |
| South West                                           | 455024 (12.3)       | 24017 (15.1)    | 464293 (12.4)      | 14748 (13.2)   | 470063 (12.4)       | 8978 (15.1)    | 474405 (12.4)        | 4636 (13.2)     |
| West Midlands                                        | 401024 (10.8)       | 17842 (11.2)    | 407566 (10.9)      | 11300 (10.1)   | 412622 (10.9)       | 6244 (10.5)    | 414886 (10.8)        | 3980 (11.4)     |
| Yorkshire & The Humber                               | 146591 (4)          | 6873 (4.3)      | 150238 (4)         | 3226 (2.9)     | 151296 (4)          | 2168 (3.7)     | 151958 (4)           | 1506 (4.3)      |
| <b>Risk factors recommended for social isolation</b> |                     |                 |                    |                |                     |                |                      |                 |
| CVD                                                  | 0 (0)               | 159069 (100)    | 139671 (3.7)       | 19398 (17.4)   | 142439 (3.7)        | 16630 (28)     | 149642 (3.9)         | 9427 (26.9)     |
| Diabetes (any type)                                  | 92270 (2.5)         | 19398 (12.2)    | 0 (0)              | 111668 (100)   | 98536 (2.6)         | 13132 (22.1)   | 107908 (2.8)         | 3760 (10.7)     |
| Chronic kidney disease                               | 42767 (1.2)         | 16630 (10.5)    | 46265 (1.2)        | 13132 (11.8)   | 0 (0)               | 59397 (100)    | 56039 (1.5)          | 3358 (9.6)      |
| COPD                                                 | 25579 (0.7)         | 9427 (5.9)      | 31246 (0.8)        | 3760 (3.4)     | 31648 (0.8)         | 3358 (5.7)     | 0 (0)                | 35006 (100)     |
| BMI>40*                                              | 28849 (2.7)         | 2324 (2.9)      | 25456 (2.4)        | 5717 (6.9)     | 30006 (2.7)         | 1167 (3.4)     | 30583 (2.7)          | 590 (3.3)       |
| Corticosteroid rx                                    | 93768 (2.5)         | 12210 (7.7)     | 99573 (2.7)        | 6405 (5.7)     | 100144 (2.6)        | 5834 (9.8)     | 91539 (2.4)          | 14439 (41.2)    |
| <b>N risk factors</b>                                |                     |                 |                    |                |                     |                |                      |                 |
| 0                                                    | 3455860 (93.3)      | 0 (0)           | 3455860 (92.1)     | 0 (0)          | 3455860 (90.9)      | 0 (0)          | 3455860 (90.3)       | 0 (0)           |
| 1                                                    | 214287 (5.8)        | 113257 (71.2)   | 252996 (6.7)       | 74548 (66.8)   | 297877 (7.8)        | 29667 (49.9)   | 314831 (8.2)         | 12713 (36.3)    |
| 2                                                    | 29714 (0.8)         | 33864 (21.3)    | 35760 (1)          | 27818 (24.9)   | 42380 (1.1)         | 21198 (35.7)   | 48624 (1.3)          | 14954 (42.7)    |
| ≥3                                                   | 3082 (0.1)          | 11948 (7.5)     | 5728 (0.2)         | 9302 (8.3)     | 6498 (0.2)          | 8532 (14.4)    | 7691 (0.2)           | 7339 (21)       |
| <b>Other risk factors</b>                            |                     |                 |                    |                |                     |                |                      |                 |
| Hypertension                                         | 332751 (9)          | 83462 (52.5)    | 355583 (9.5)       | 60630 (54.3)   | 378532 (10)         | 37681 (63.4)   | 402966 (10.5)        | 13247 (37.8)    |
| ACE inhibitor rx                                     | 162700 (4.4)        | 52222 (32.8)    | 172910 (4.6)       | 42012 (37.6)   | 191583 (5)          | 23339 (39.3)   | 207045 (5.4)         | 7877 (22.5)     |
| NSAID rx                                             | 542395 (14.6)       | 36693 (23.1)    | 553123 (14.7)      | 25965 (23.3)   | 565096 (14.9)       | 13992 (23.6)   | 571656 (14.9)        | 7432 (21.2)     |

\*BMI data available for 1067854 patients with no CVD, 80142 patients with CVD, 1064775 with no DM, 83221 with DM, 1113396 with no CKD, 34600 with CKD, 1130189 with no COPD and 17807 with COPD

*COPD: Chronic obstructive pulmonary disease, CKD: Chronic kidney disease, CVD: cardiovascular disease, DM: diabetes mellitus*
